# Supplementary material for: Quantification of Somatic Chromosomal Rearrangements in Circulating Cell-Free DNA from Ovarian Cancers
Source: PubMed Central journal article supplement (PMC4951715; doi:10.1038/srep29831), 2016-07-20
Supplement: srep29831-s1.pdf [file srep29831-s1.pdf]

# Supplemental Information

## Quantification of Somatic Chromosomal Rearrangements in Circulating Cell-Free DNA from Ovarian Cancers

Faye R. Harris<sup>1\*\*</sup>, Irina V. Kovtun<sup>2\*\*</sup>, James Smadbeck<sup>1</sup>, Francesco Multinu<sup>3</sup>, Aminah Jatoi<sup>4</sup>, Farhad Kosari<sup>1</sup>, Kimberly R. Kalli<sup>4</sup>, Stephen J. Murphy<sup>1</sup>, Geoffrey C. Halling<sup>1</sup>, Sarah H. Johnson<sup>1</sup>, Minetta C. Liu<sup>4</sup>, Andrea Mariani<sup>3\*</sup>, George Vasmatazsis<sup>1\*</sup>

\* \*These authors contributed equally to the study

\* Corresponding authors

Supplemental  
Figure S1  
OC004

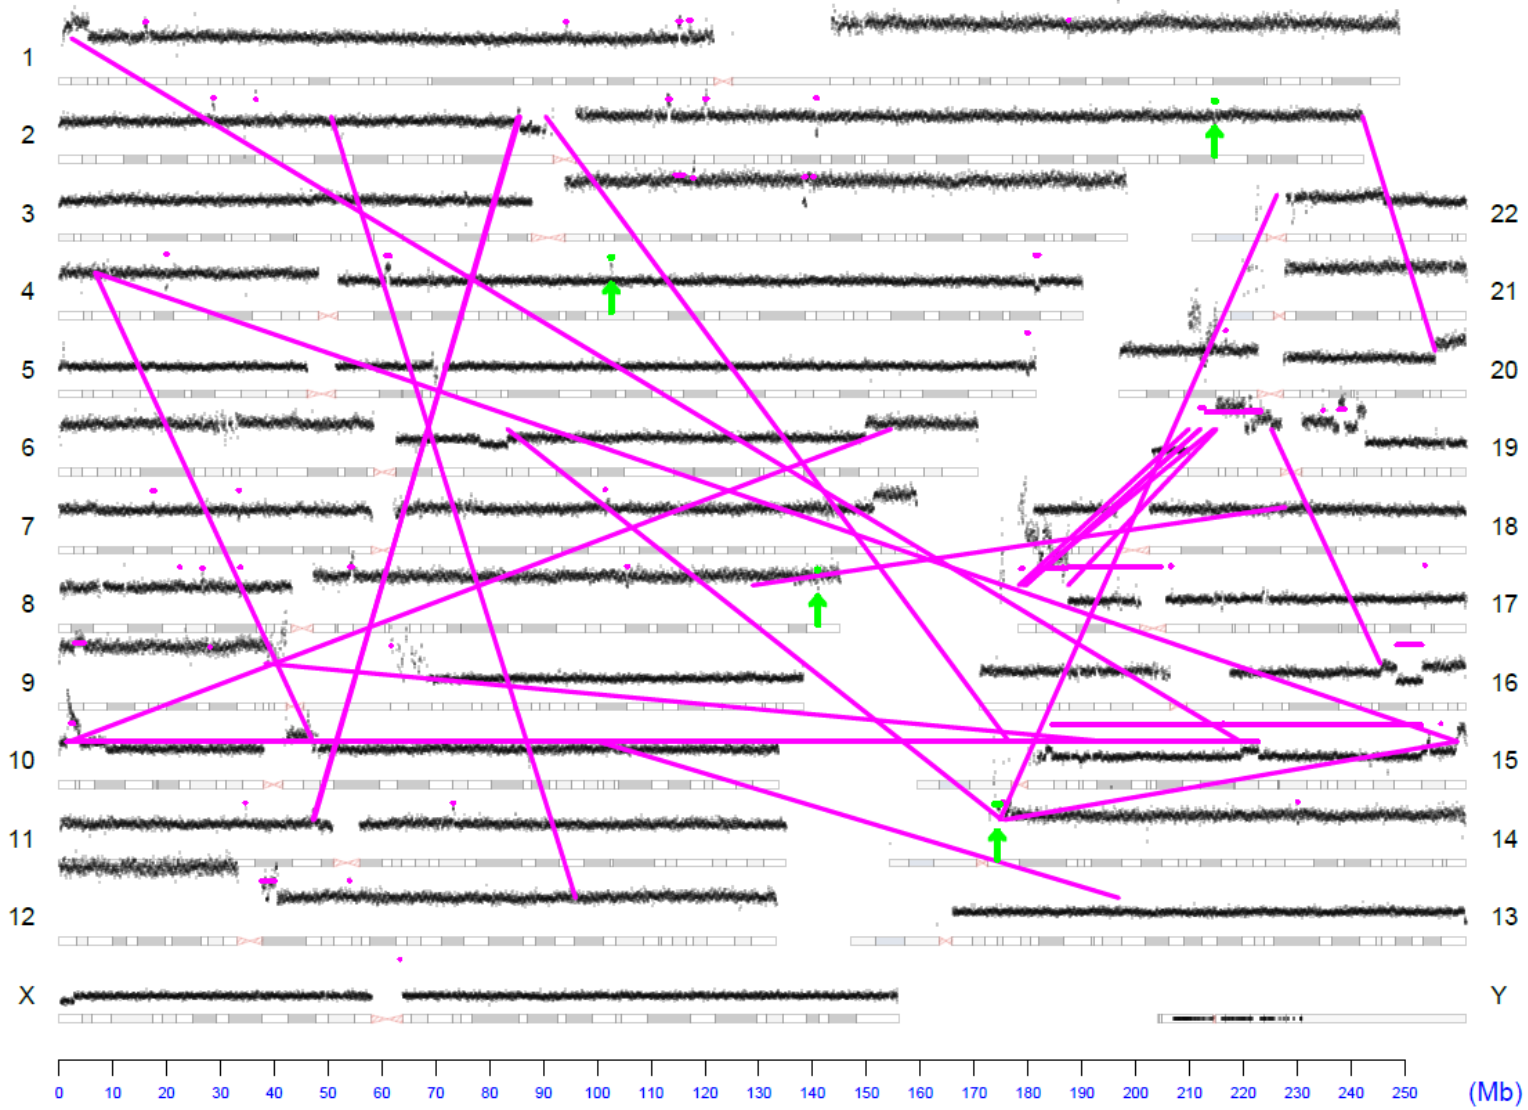

# Supplemental Figure S2

OC024

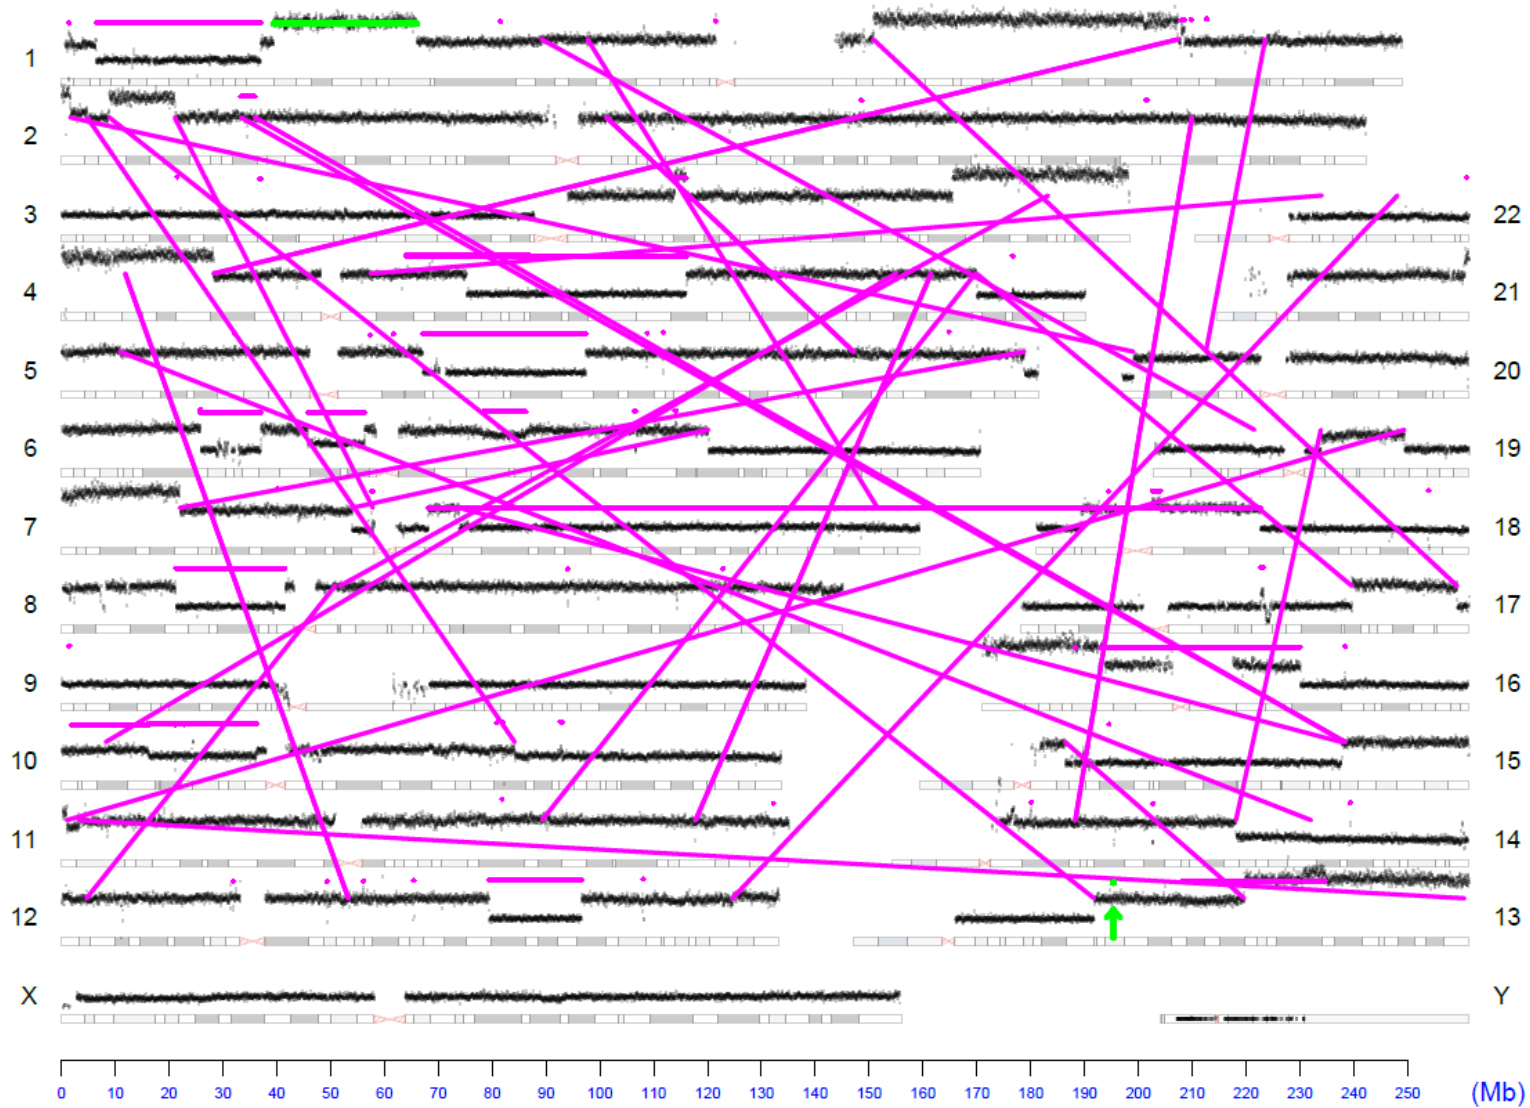

# Supplemental Figure S3

OC058

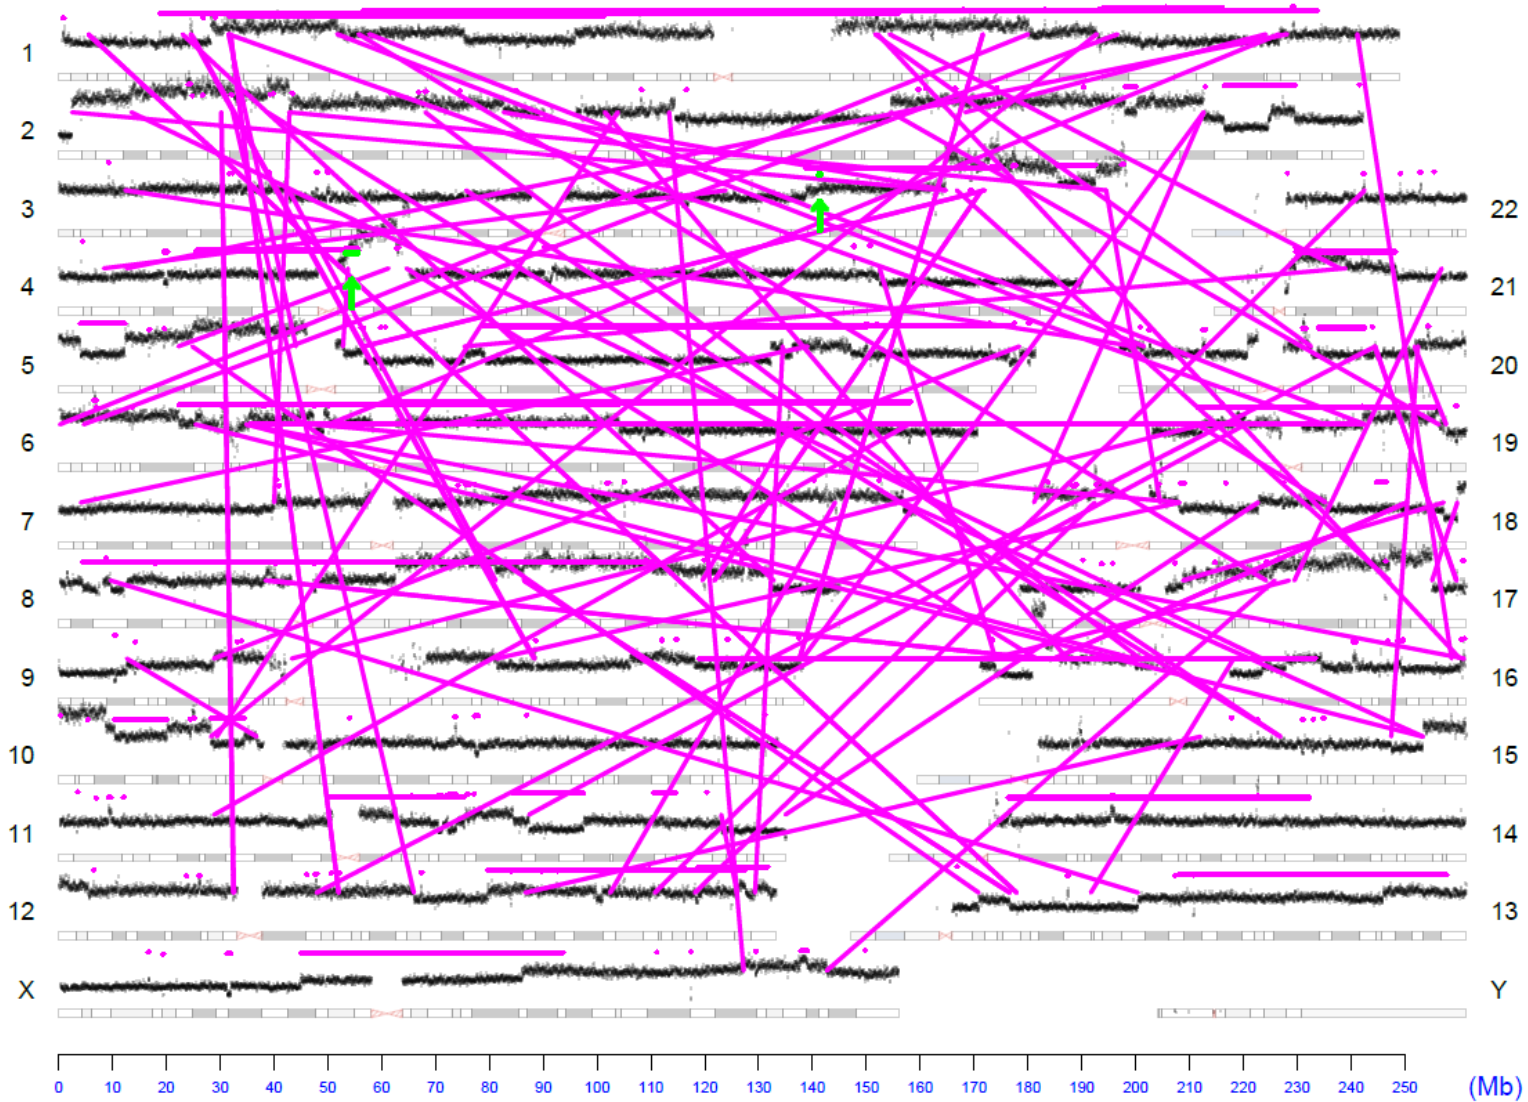

Supplemental  
Figure S4  
OC063

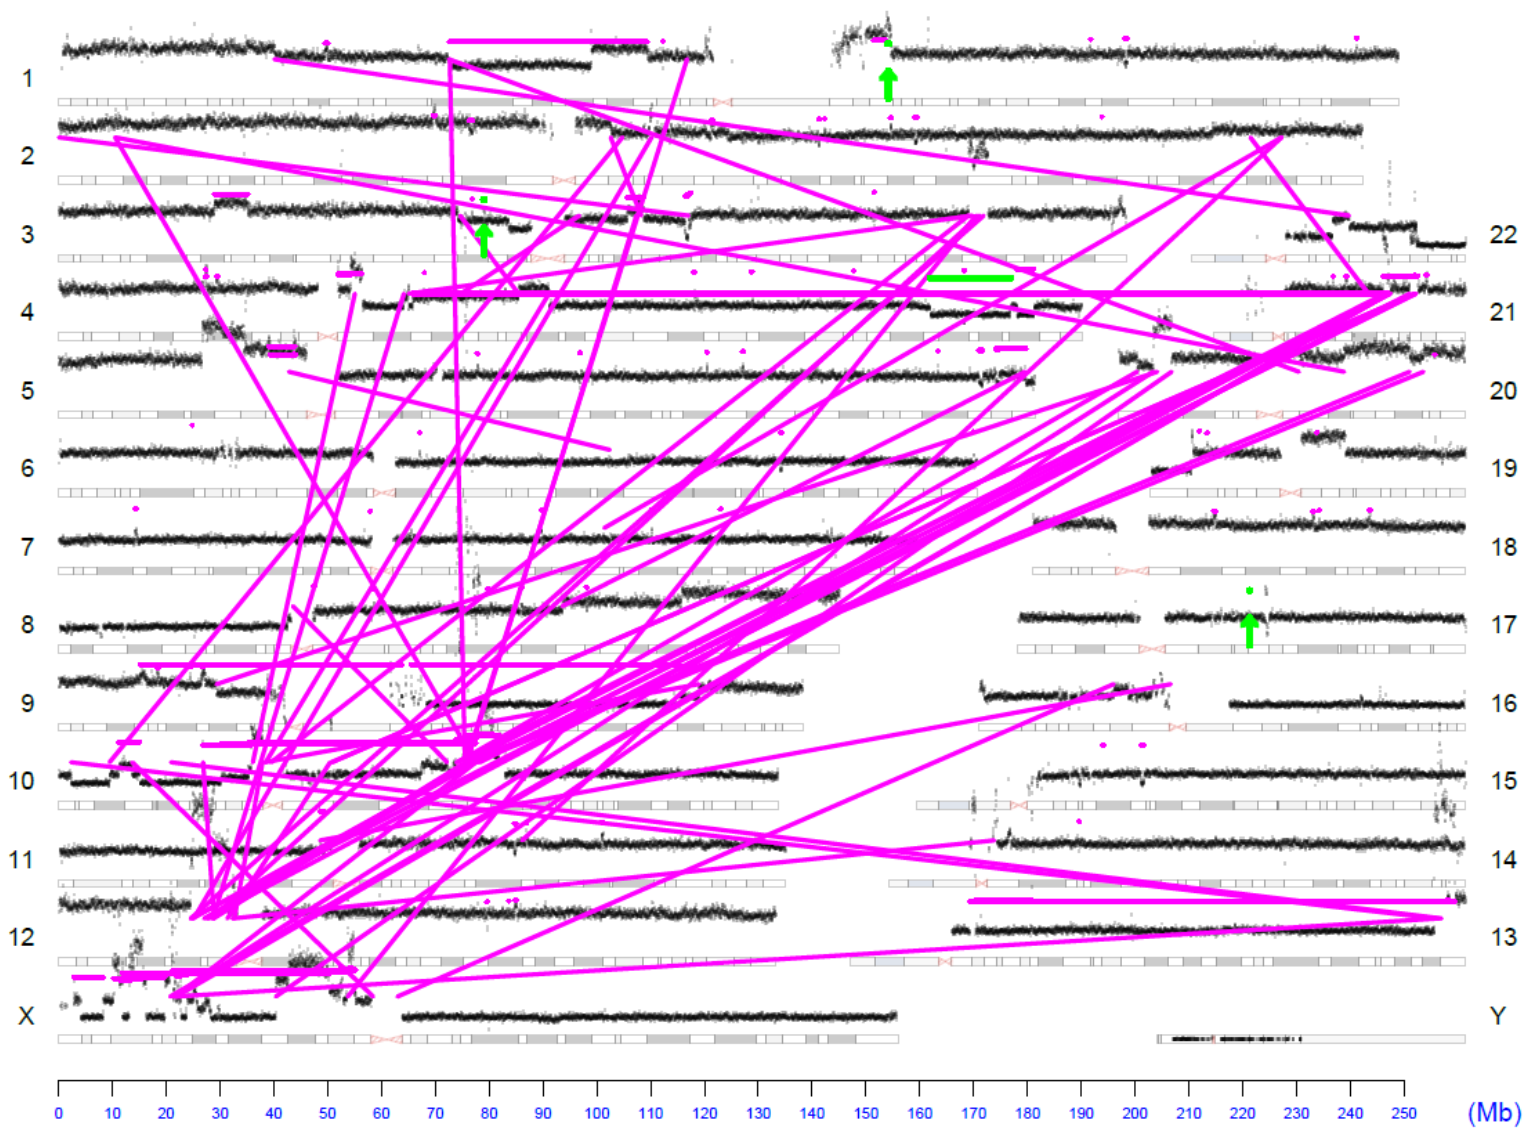

# Supplemental Figure S5

OC068

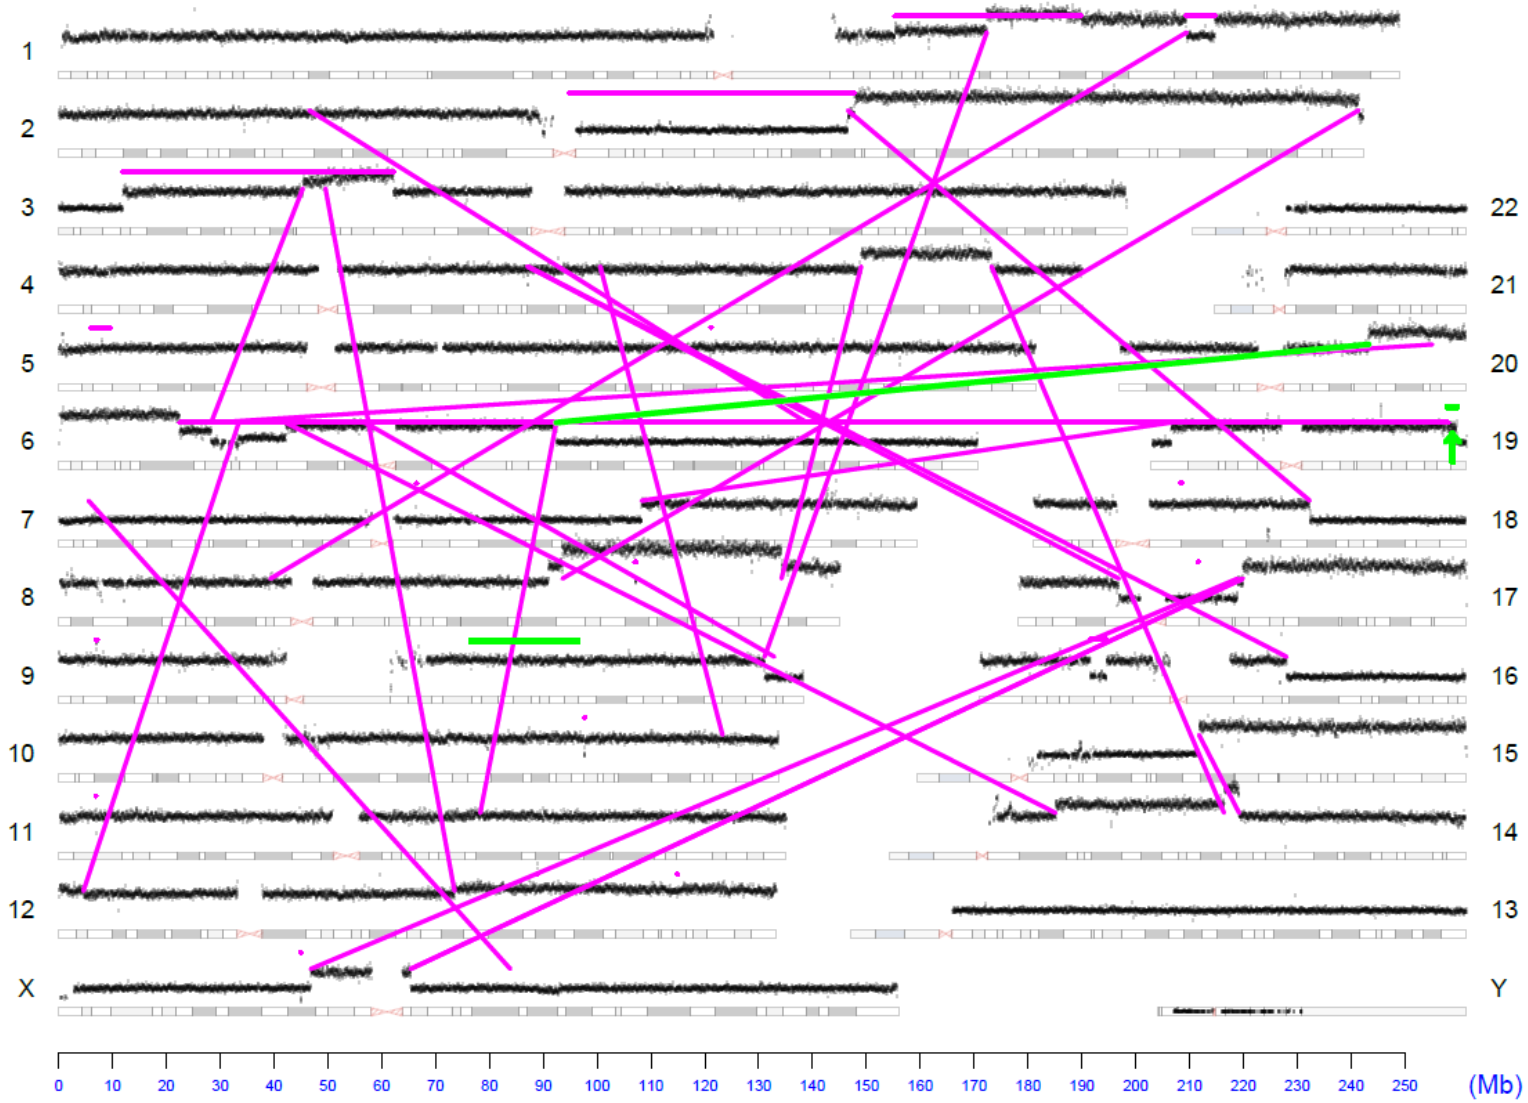

# Supplemental Figure S6

OC073

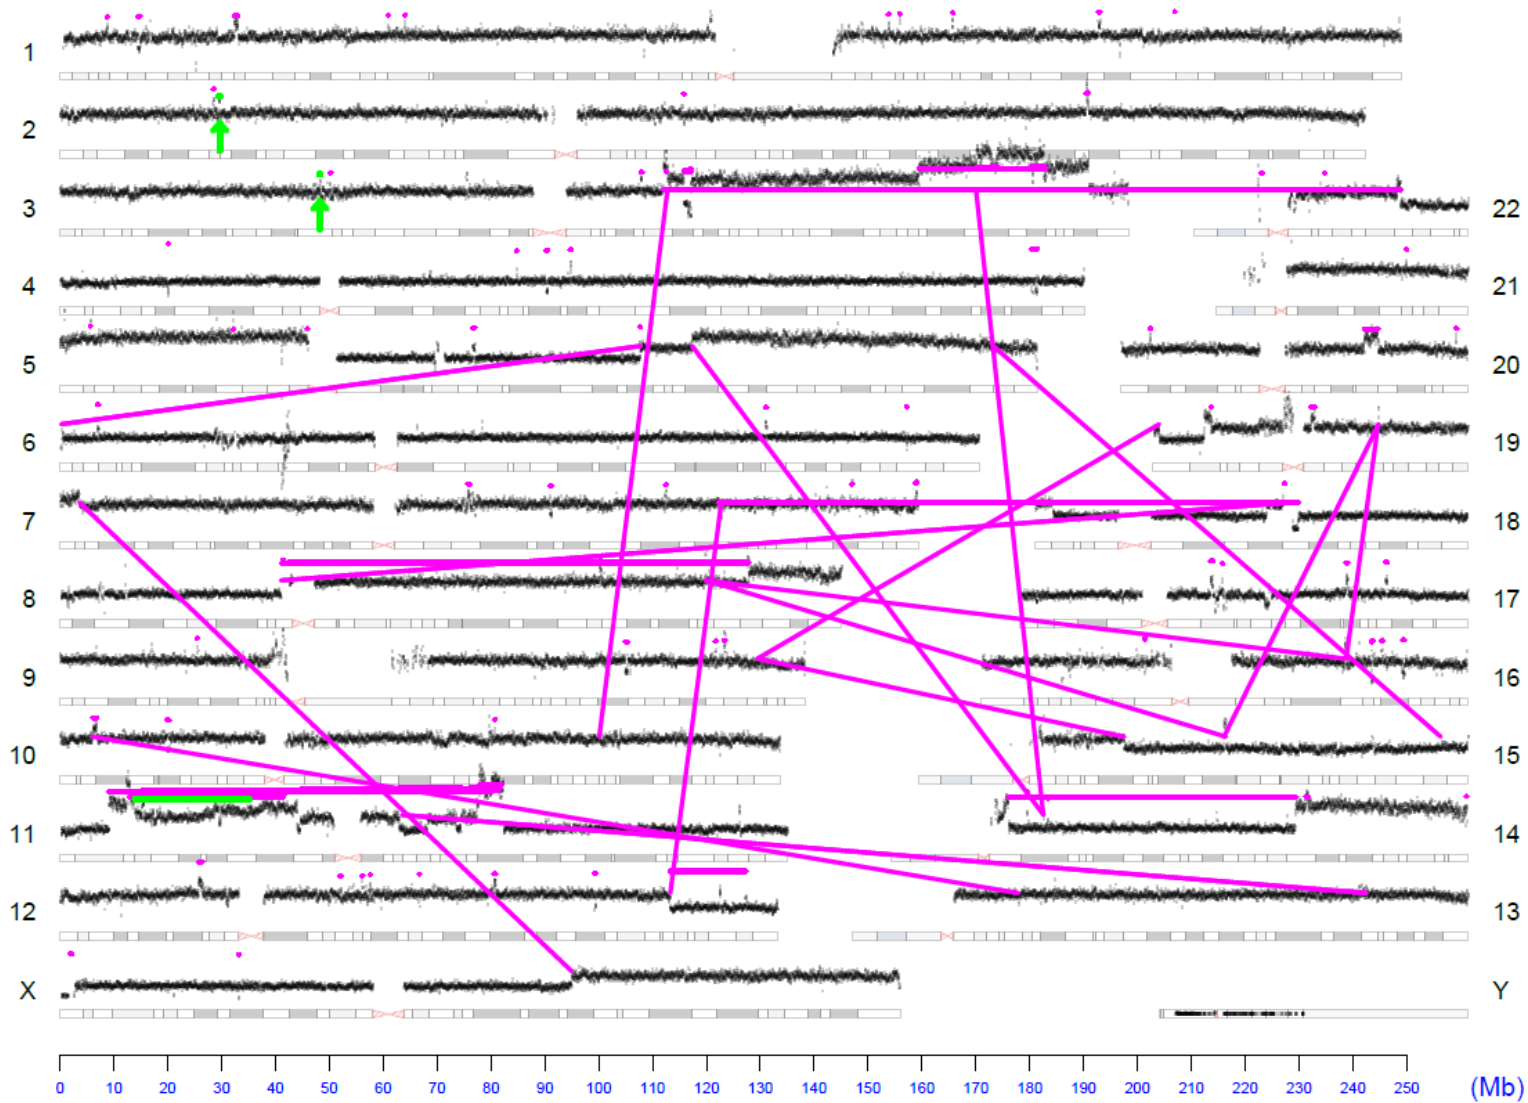

(Mb)

# Supplemental Figure S7

OC084

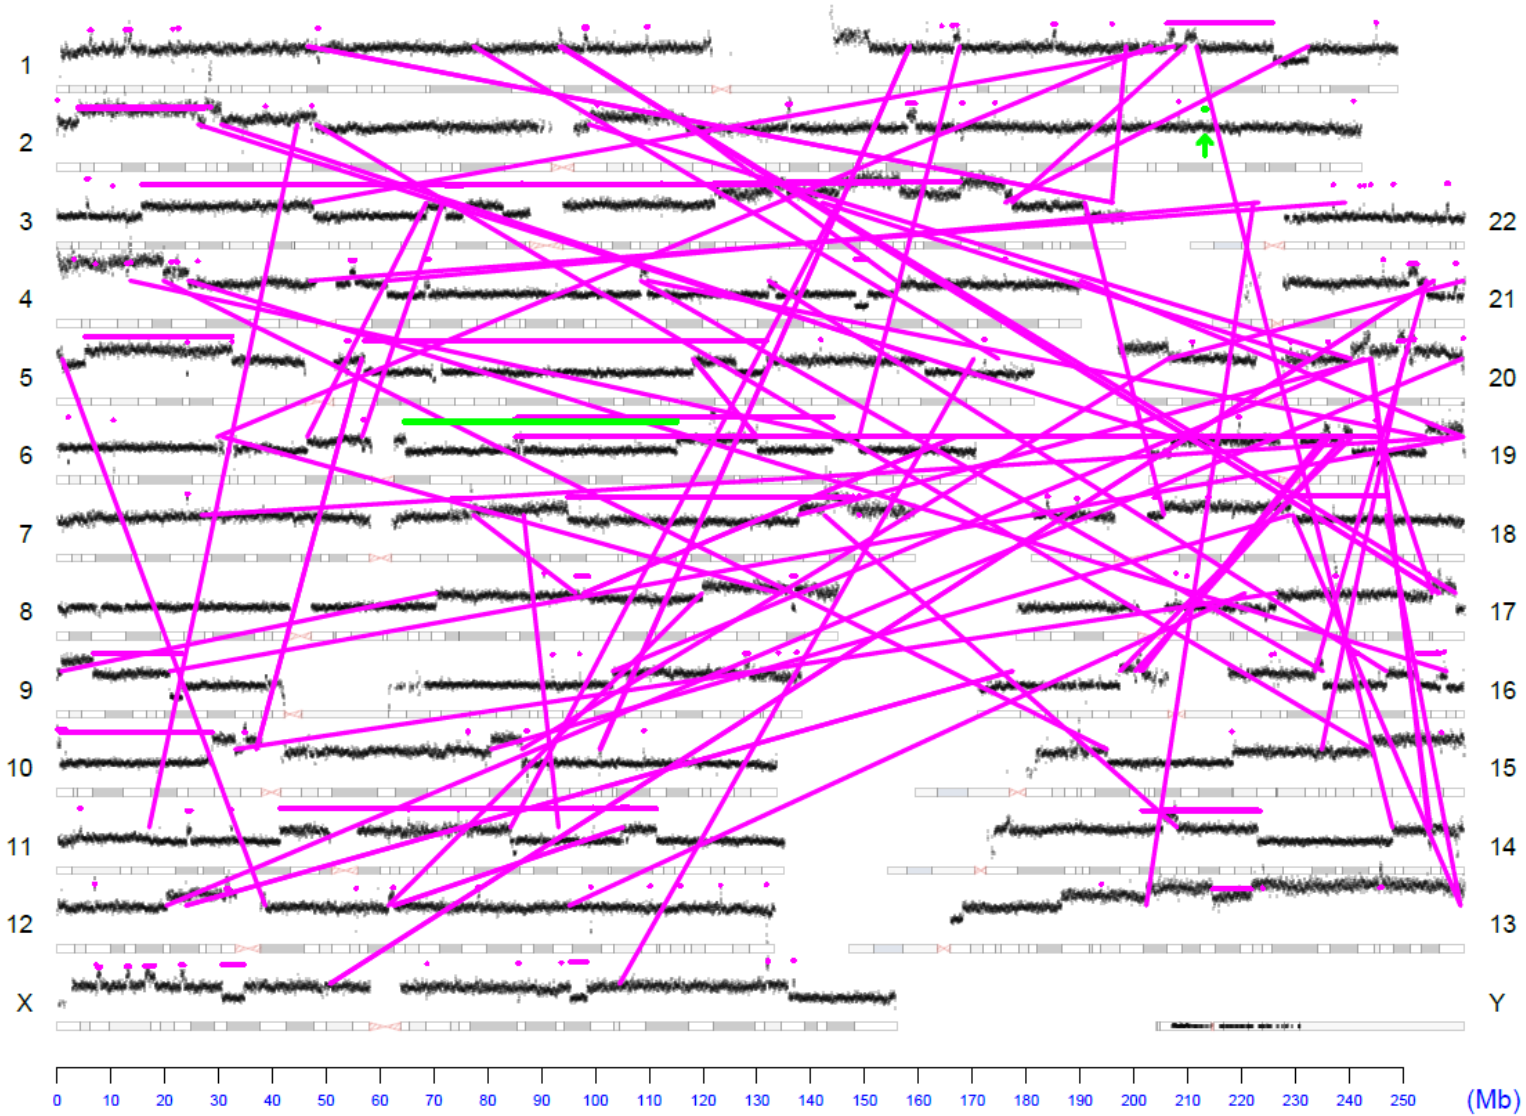



Supplemental OC101  
Figure S8

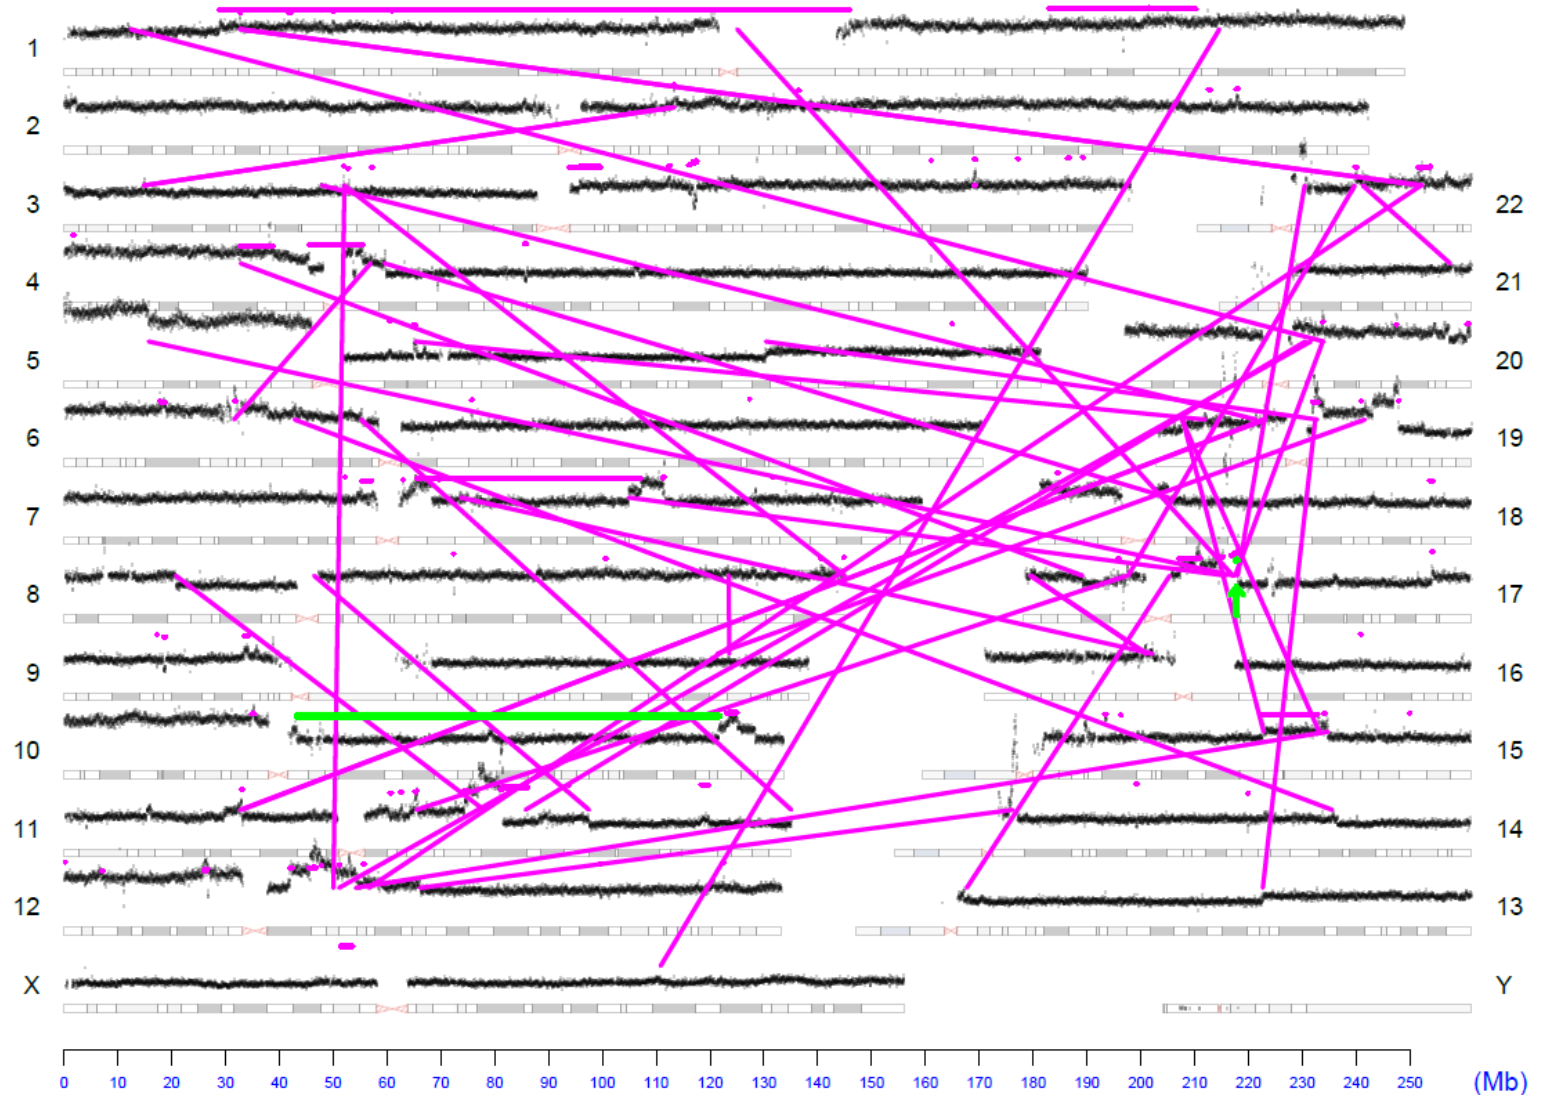

**Supplemental Figure S1-8. Genome Plots.** Plots for those not already in the main manuscript. Chromosomes are listed on the left and right Y-axis; basepair position is on the X axis. Grey cytobands indicate genomic loci bands. The height of the black dots each represents the average number of reads over 30k bases. Magenta dots indicate small intrachromosomal rearrangements, while the magenta lines indicate interchromosomal rearrangements or larger intrachromosomal junctions. Green lines/dots indicate the junctions of interest monitored in the blood.

## Supplemental Figure S9

A.

| Case   | Pre-surgical serum (ng/mL) | Pre-surgical plasma (ng/mL) | Post-surgical plasma (ng/mL) |
|--------|----------------------------|-----------------------------|------------------------------|
| OC004  | NT                         | 18                          | 5.7                          |
| OC024  | NT                         | 23.3                        | 14.7                         |
| OC049  | 22.7                       | 35                          | 9                            |
| OC058  | NT                         | 15                          | 11.7                         |
| OC063  | NT                         | 13                          | 17.3                         |
| OC067  | 20.7                       | 12                          | 32.3                         |
| OC068  | NT                         | 14.7                        | 24                           |
| OC073  | 63.3                       | 28.7                        | 18.3                         |
| OC084  | NT                         | 21                          | 10                           |
| OC101* | 91.3                       | 12                          | 11.3                         |

B.

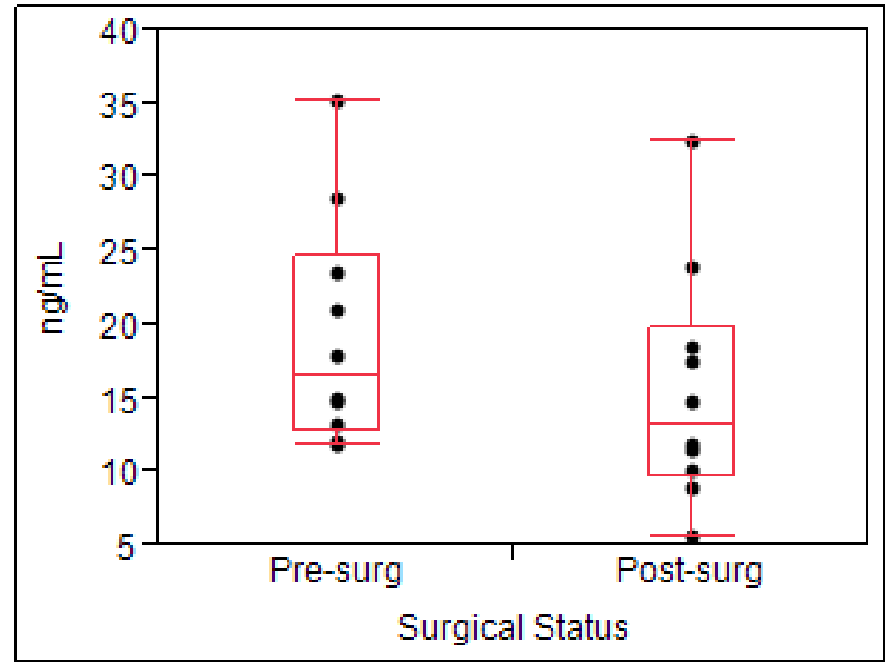

**Supplemental Figure S9. Total cfDNA.** A) Total yield of cfDNA obtained. \*1.5mL used for OC101 pre-surgical serum. NT: not tested. B) Yields of cfDNA obtained in pre-surgical plasma compared to post-surgical plasma.

# Supplemental Figure S10.

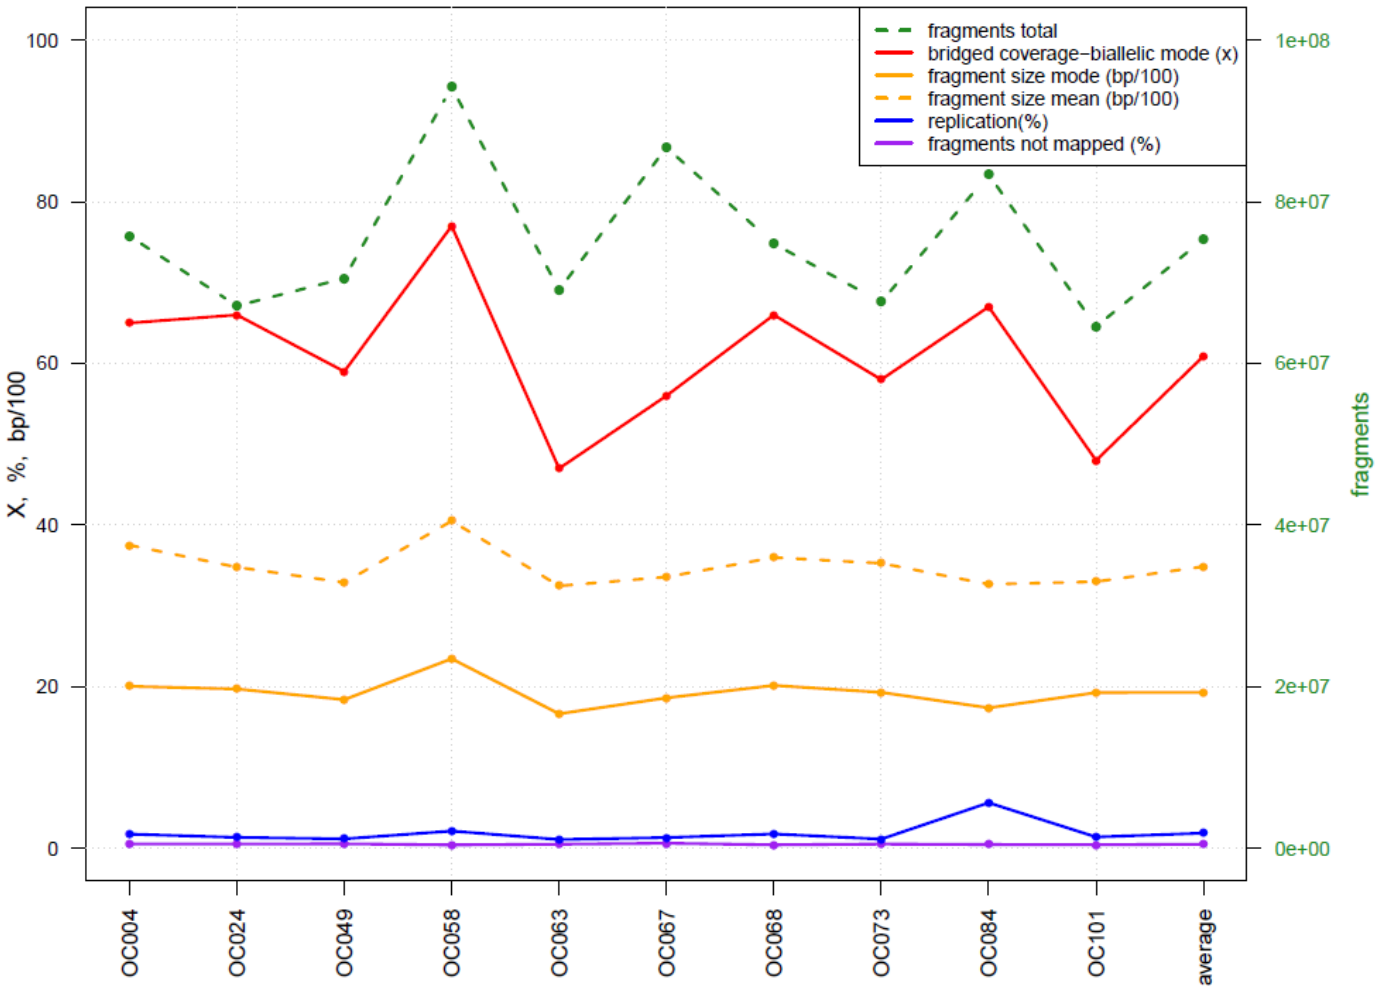

**Supplemental Figure S10. Mate-pair sequencing coverage.** The bi-allelic bridged coverage for these 10 samples averaged 61x, ranging from 47-77x. Bridged coverage, the estimated number of fragments (read-pairs) spanning a given position on the reference genome, is a function of the number of unique fragments sequenced for the sample and the length of each fragment. The samples had an average of 75 million total fragments (right vertical axis), with a low replication rate, averaging 2%. All replicate fragments are removed as the first step in the SVAtools analysis. The fragment length distribution for each sample reveals a skewed bell curve; resulting in a fragment length mean (mean length=3487 bp) that is 1556 bp larger than the peak of the distribution curve (mode length=1931 bp). Fragment lengths were divided by 100 to scale to the left vertical axis. Less than 1% of all fragments did not map to the reference Genome, GRCh38.

**Supplemental Table S1. Description of junctions tested.** Genome position and primer sequences for each rearrangement are indicated.

| Case ID | Number of Supporting Mate Pairs | Chromosome A | Chromosome B | Position A of representative mate-pair (GRCh38) | Position B of representative mate-pair (GRCh38) | Locus A  | Locus B  | Gene A   | Gene B  | Event size of intra-chromosomal rearrangements (bp) | Putatively Targetable? | Primer A Sequence for qPCR    | Primer B Sequence for qPCR     | Product Size (bp) |
|---------|---------------------------------|--------------|--------------|-------------------------------------------------|-------------------------------------------------|----------|----------|----------|---------|-----------------------------------------------------|------------------------|-------------------------------|--------------------------------|-------------------|
| OC004   | 8                               | 2            | 2            | 214500173                                       | 214750815                                       | 2q35     | 2q35     | VWC2L    | BARD1   | 250000                                              | yes                    | ggctaaacaagatgtatcaggctagtc   | GAGTGTTCAGTAAGTGTGTGCTGAATGC   | 170               |
| OC004   | 20                              | 4            | 4            | 102513691                                       | 102661946                                       | 4q24     | 4q24     | NFKB1    | MANBA   | 141000                                              | yes                    | GATAGCTTGGGACCAGGAAGTCGAG     | gcctttcaattgctctggatatacc      | 258               |
| OC004   | 21                              | 8            | 8            | 140868236                                       | 140969369                                       | 8q24.3   | 8q24.3   | PTK2     | PTK2    | 102000                                              | yes                    | gacaagggcacacctaattgg         | CACCTTTGAGCAGTGCCAGTCTAG       | 227               |
| OC004   | 18                              | 14           | 14           | 19468136                                        | 20360320                                        | 14q11.2  | 14q11.2  | no_gene  | PARP2   | 783000                                              | yes                    | gatgttctcacactgcgtatgc        | GGAAGTGTGTTTATCTGTGTTGTG       | 227               |
| OC024   | 37                              | 1            | 1            | 39424833                                        | 66009257                                        | 1p34.3   | 1p31.3   | MACF1    | PDE4B   | 26582000                                            | no                     | GCC TTCGTTCCAGTACACTTGC       | gtgatccatactcagcctcatcatc      | 130               |
| OC024   | 60                              | 13           | 13           | 48272756                                        | 48309939                                        | 13q14.2  | 13q14.2  | no_gene  | RB1     | 42000                                               | no                     | gcattctaccaccaattctaatacag    | GGTGGGAGGCATTTATGGAGG          | 144               |
| OC049   | 17                              | 1            | 1            | 155033892                                       | 156025421                                       | 1q22     | 1q22     | DCST1    | no_gene | 989000                                              | yes                    | GGGAAATTGAGTCCAGAGAAGG        | ctaatagcacaaaaacaaacac         | 55                |
| OC049   | 9                               | 1            | 1            | 42956265                                        | 43140388                                        | 1p34.2   | 1p34.2   | LC2A1-AS | no_gene | 176000                                              | yes                    | GGATGGTGTGAAACACATAGGTAAGC    | gagcagaatcactatgtgtccag        | 79                |
| OC058   | 24                              | 3            | 3            | 141255158                                       | 141349878                                       | 3q23     | 3q23     | PXYLP1   | ZBTB38  | 86000                                               | no                     | CCAGGGTCTATCTCCTCCAAC         | gaccagttgctctcatactatcc        | 115               |
| * OC058 | 22                              | 4            | 4            | 53422008                                        | 55407478                                        | 4q12     | 4q12     | FIP1L1   | TMEM165 | 1992000                                             | no                     | gcagtcagtgtaggcatagcttgc      | GGCAGAATAATGAAGCCCGTTTGAC      | 99                |
| OC063   | 8                               | 1            | 1            | 153951573                                       | 154354284                                       | 1q21.3   | 1q21.3   | CRTC2    | ATP8B2  | 404000                                              | yes                    | atctggggactgcccttctc          | ggacatgtgtgggtccaggac          | 65                |
| OC063   | 9                               | 3            | 3            | 78910459                                        | 79115587                                        | 3p12.3   | 3p12.3   | ROBO1    | ROBO1   | 205128                                              | no                     | atggctgtgtcactggaag           | GCCAGTAAAATGAGTGACTTCAAGTT     | 69                |
| OC063   | 14                              | 4            | 4            | 161938467                                       | 176795255                                       | 4q32.2   | 4q34.3   | FSTL5    | no_gene | 14856788                                            | no                     | gaaatttctgacagaaatgaaaggac    | AGGGAGGACAAGAACTCGGGA          | 67                |
| OC063   | 3                               | 17           | 17           | 43070545                                        | 43189953                                        | 17q21.31 | 17q21.31 | BRCA1    | NBR1    | 119408                                              | yes                    | gtaccttctctcctggctcga         | CTGTTTTAGCAGGACTGTTTTAGCTG     | 55                |
| OC067   | 14                              | 2            | 9            | 217530038                                       | 125630623                                       | 2q35     | 9q33.3   | DIRC3    | MAPKAP1 | NA                                                  | yes                    | CCATCAAAGGGGTGCTATAAAAATAGATC | tccctactttgtcaaccacagcc        | 80                |
| OC067   | 11                              | 17           | 17           | 74827720                                        | 75050587                                        | 17q25.1  | 17q25.1  | TMEM104  | KCTD2   | 222000                                              | no                     | GTAAAACCTGGCTCACAGCAATCG      | ctcaagaagctggaagctggcc         | 151               |
| OC068   | 16                              | 6            | 20           | 92413168                                        | 46245626                                        | 6q15     | 20q13.12 | no_gene  | CDH22   | NA                                                  | no                     | GGATCACTGAGGTTGGGAGTTC        | gggccatctcagctctcacc           | 63                |
| OC068   | 54                              | 9            | 9            | 76625384                                        | 96299846                                        | 9q21.2   | 9q22.32  | PRUNE2   | HSD17B3 | 19827000                                            | yes                    | ggtttggaaacgctgtgaagc         | gtcaggagttcgagaccagcc          | 65                |
| OC068   | 24                              | 19           | 19           | 55261376                                        | 56799006                                        | 19q13.42 | 19q13.43 | HSPBP1   | ZIM2    | 1539000                                             | yes                    | ggactggagtactactttcaacaatcag  | caagattatgctctcagtttccac       | 110               |
| OC073   | 19                              | 2            | 2            | 29567208                                        | 29683942                                        | 2p23.2   | 2p23.2   | ALK      | ALK     | 117000                                              | no                     | GGGTTCCAGTCTCTGTATAAAAGC      | gggtattcttccattctgtgcc         | 101               |
| OC073   | 13                              | 3            | 3            | 48188489                                        | 48261333                                        | 3p21.31  | 3p21.31  | CDC25A   | ZNF589  | 70000                                               | yes                    | GGAGAAGTTGCTTACTGATTGGTGG     | gagccaggatcacgccaact           | 95                |
| OC073   | 4                               | 11           | 11           | 13960361                                        | 35139867                                        | 11p15.2  | 11p13    | no_gene  | CD44    | 21184000                                            | yes                    | cctctaagaaggtactctggcacc      | CCGTAACCCCACTGAAGAGCAG         | 91                |
| OC084   | 3                               | 2            | 2            | 212873139                                       | 213482206                                       | 2q34     | 2q34     | ERBB4    | no_gene | 609000                                              | no                     | acatacaagggaaactccacaagc      | CATATTTAATTCATCTTATGTCTTGGTG   | 69                |
| OC084   | 14                              | 6            | 6            | 64735029                                        | 115063000                                       | 6q12     | 6q22.1   | EYS      | no_gene | 49941000                                            | no                     | tagcaaacagcctaatacaatcattg    | GACATGATTTAGTTTAAAGTCAGTCAACTC | 140               |
| OC101   | 8                               | 10           | 10           | 43250167                                        | 121579008                                       | 10q11.21 | 10q26.13 | RASGEF1A | FGFR2   | 79594000                                            | yes                    | gattgattactgctctgtttgcc       | CTTCTGATGGCAGATGTGTAAGTGC      | 78                |
| OC101   | 11                              | 17           | 17           | 39548840                                        | 39717320                                        | 17q12    | 17q12    | no_gene  | ERBB2   | 174000                                              | yes                    | gagaccagcctcatcgacctata       | cacccttcaggctctttctg           | 77                |

\* Both breakpoints for this junction were tested
